# Supplementary material for: Is the Age of Developmental Milestones a Predictor for Future Development in Down Syndrome?
Source: MDPI journal article supplement (doi:10.3390/brainsci11050655), 2021-05-18
Supplement: s1 [file s1]

## Supplementary material

**Table S1** BIC values Preschooler group

| Model | Griffiths<br>A  | Griffiths<br>B  | Griffiths<br>C (n=25) | Griffiths<br>D (n=25) | Griffiths<br>E (n=25) | DP3<br>Motor   | DP3<br>Social   | DP3<br>Adaptive | DP3<br>Cognitive | DP3<br>Communic<br>ation | VABS<br>Communic<br>ation | VABS<br>Daily   | VABS<br>Social  | VABS<br>Motor   |
|-------|-----------------|-----------------|-----------------------|-----------------------|-----------------------|----------------|-----------------|-----------------|------------------|--------------------------|---------------------------|-----------------|-----------------|-----------------|
| 0     | <b>183.8367</b> | <b>214.0786</b> | <b>149.4189</b>       | <b>182.3136</b>       | 147.2321              | 218.8308       | 232.7863        | 219.5171        | <b>219.2041</b>  | <b>237.8046</b>          | 236.4872                  | <b>228.3330</b> | <b>232.7600</b> | 200.0452        |
| 1     | 187.0475        | 215.7291        | 152.1630              | 184.8227              | <b>144.9197</b>       | 220.5530       | 235.3398        | 222.6596        | 222.2147         | 239.7109                 | <b>235.7161</b>           | 229.9747        | 235.4562        | 198.2993        |
| 2     | 187.2344        | 216.9223        | 152.0860              | 185.2522              | 150.4390              | 221.7162       | 234.2102        | 221.4057        | 220.8504         | 239.9468                 | 239.7521                  | 231.6058        | 235.8802        | 203.1591        |
| 3     | 186.4767        | 217.4797        | 152.5984              | 185.2866              | 150.4244              | 222.1167       | 236.0210        | 222.8346        | 222.4863         | 238.3774                 | 239.0993                  | 231.1762        | 236.1437        | 202.9561        |
| 4     | 185.8909        | 214.5057        | 150.5897              | 182.8096              | 148.6207              | <b>18.7499</b> | <b>230.9375</b> | <b>216.5412</b> | 220.7383         | 238.5497                 | 238.2601                  | 229.1011        | 234.7745        | 203.1335        |
| 5     | 190.4417        | 218.6466        | 154.7831              | 187.7826              | 148.1370              | 223.5094       | 236.5426        | 224.4573        | 223.9264         | 241.9399                 | 239.0390                  | 233.1789        | 238.6167        | 201.1870        |
| 6     | 189.1047        | 218.7832        | 155.3704              | 187.1072              | 146.1531              | 223.9130       | 238.7394        | 225.7627        | 225.1786         | 241.3929                 | 239.1085                  | 231.2357        | 238.5836        | <b>197.9131</b> |
| 7     | 189.2154        | 216.6170        | 153.5609              | 185.6272              | 146.8614              | 220.9509       | 232.4207        | 218.9965        | 223.9414         | 240.8721                 | 237.9914                  | 231.1848        | 237.6996        | 201.6307        |
| 8     | 189.8364        | 220.3063        | 155.3021              | 188.3109              | 153.6371              | 224.9012       | 237.5738        | 224.5528        | 224.2317         | 239.5690                 | 242.2247                  | 234.3380        | 239.2791        | 205.9177        |
| 9     | 188.3826        | 217.9006        | 153.7244              | 185.8458              | 151.8313              | 222.0814       | 234.0177        | 219.9068        | 223.9579         | 239.1475                 | 240.9419                  | 231.7517        | 238.1377        | 205.9970        |
| 10    | 189.1938        | 217.7298        | 152.7444              | 185.9469              | 151.8271              | 222.0185       | 233.2560        | 219.2778        | 222.9492         | 241.2537                 | 241.6491                  | 231.9531        | 238.0865        | 206.0827        |
| 11    | 192.3987        | 221.8340        | 157.9114              | 190.2389              | 149.2775              | 226.9054       | 239.8724        | 227.1554        | 227.1491         | 242.7718                 | 242.4167                  | 234.0326        | 241.8286        | 199.8713        |
| 12    | 191.2435        | 219.6614        | 156.7736              | 188.2072              | 148.4066              | 224.3142       | 235.8216        | 221.9820        | 226.8988         | 242.3702                 | 241.3812                  | 232.3278        | 240.8283        | 201.2466        |
| 13    | 192.5136        | 219.8572        | 155.6956              | 188.7662              | 150.0597              | 224.2338       | 234.5864        | 221.6693        | 226.1685         | 243.5943                 | 241.3880                  | 233.9662        | 241.0203        | 204.4098        |
| 14    | 191.5388        | 221.1310        | 155.9539              | 189.0214              | 155.0328              | 225.3083       | 236.4987        | 222.5636        | 226.2904         | 241.1016                 | 244.2725                  | 234.3060        | 241.4666        | 208.7224        |
| 15    | 194.3061        | 222.9797        | 158.8905              | 191.4134              | 151.4240              | 227.6187       | 237.9410        | 224.3535        | 229.3529         | 244.4100                 | 244.7740                  | 234.3828        | 244.1961        | 202.9925        |

**Table S2** Correlations between developmental milestones in the Preschooler and School-age group

|                              | Preschoolers (n=30) | Schoolers (n=53) |
|------------------------------|---------------------|------------------|
| Sitting - Walking            | −0.055              | 0.709            |
| Sitting - Babbling           | 0.407               | 0.763            |
| Walking - Babbling           | 0.161               | 0.496            |
| Sitting - Sphincter Control  | -                   | 0.547            |
| Walking - Sphincter Control  | -                   | 0.450            |
| Babbling - Sphincter Control | -                   | 0.486            |

**Table S3** BIC values School-age group

| Model | WPPSI<br>Verbal | WPPSI<br>Non<br>Verbal | DP3<br>Motor    | DP3<br>Social   | DP3<br>Adaptive | DP3<br>Cognitive | DP3<br>Comunic<br>ation | VABS<br>Comunic<br>ation | VABS<br>Daily   | VABS<br>Social  |
|-------|-----------------|------------------------|-----------------|-----------------|-----------------|------------------|-------------------------|--------------------------|-----------------|-----------------|
| 0     | 462.6839        | 427.0585               | 473.7973        | 494.8722        | 490.0516        | 480.5409         | 491.2665                | 468.6485                 | 448.7541        | 455.3266        |
| 1     | 462.5352        | 426.0744               | 474.9016        | 498.3009        | 489.2435        | 481.1311         | 493.1932                | 471.2392                 | 451.5976        | 459.0779        |
| 2     | 464.1713        | 426.9007               | 471.2445        | 498.1745        | 487.9068        | 481.8160         | 492.7652                | 469.9373                 | 450.8707        | 458.1049        |
| 3     | 448.4967        | 425.9804               | 477.1562        | 498.0039        | 491.4667        | 478.0030         | 489.0327                | 468.8832                 | 452.5134        | 459.2967        |
| 4     | 451.9535        | <b>424.0357</b>        | <b>468.5921</b> | <b>494.1086</b> | <b>475.6470</b> | <b>463.2027</b>  | <b>478.4581</b>         | <b>460.5672</b>          | <b>441.5026</b> | <b>452.1373</b> |
| 5     | 466.4593        | 429.5943               | 475.1978        | 502.0950        | 491.4513        | 484.8561         | 496.5274                | 473.9068                 | 454.8207        | 461.8868        |
| 6     | 448.9690        | 429.2878               | 478.2486        | 501.9707        | 493.2067        | 481.9563         | 492.5010                | 472.6480                 | 455.2727        | 462.7663        |
| 7     | 455.9224        | 427.0245               | 472.5516        | 497.7863        | 479.6163        | 466.6664         | 481.5609                | 463.8156                 | 444.6332        | 454.6084        |
| 8     | 452.1889        | 428.7417               | 474.9132        | 501.7967        | 491.6520        | 481.7392         | 492.8149                | 472.1997                 | 454.7805        | 461.7030        |
| 9     | 446.2818        | 426.4286               | 472.1465        | 498.0760        | 479.5501        | 466.5185         | 481.5477                | 464.2576                 | 443.9856        | 454.1737        |
| 10    | 455.8658        | 427.1605               | 470.7591        | 498.0101        | 479.1728        | 466.8369         | 482.2788                | 464.5367                 | 445.4112        | 456.0635        |
| 11    | 452.4266        | 432.6682               | 478.7791        | 505.7119        | 495.4192        | 485.4434         | 495.3407                | 474.8157                 | 458.5773        | 465.6722        |
| 12    | <b>439.9790</b> | 430.3685               | 475.5315        | 501.5592        | 483.4782        | 467.2752         | 480.4580                | 465.3189                 | 447.9447        | 458.0065        |
| 13    | 459.7829        | 430.8313               | 473.9160        | 501.7498        | 482.8423        | 470.6014         | 485.4817                | 467.3146                 | 448.4543        | 458.1261        |
| 14    | 447.9042        | 430.1338               | 473.2347        | 501.9787        | 482.8596        | 469.6154         | 484.9151                | 468.1988                 | 447.9173        | 458.0517        |
| 15    | 443.9265        | 434.0900               | 477.1796        | 505.5118        | 486.7567        | 471.2453         | 484.1835                | 468.5016                 | 451.8254        | 461.6228        |
